# Supplementary material for: Job Stress and Job Satisfaction among Health-Care Workers of Endoscopy Units in Korea
Source: PubMed Central journal article supplement — Clin Endosc. 2016 Feb 22;49(3):266–72. doi: 10.5946/ce.2015.085 (PMC4895948; doi:10.5946/ce.2015.085), 2016-02-22
Supplement: ce-2015-085-supple.pdf [file ce-2015-085-supple.pdf]

**Supplementary Table 1.** Subscales and Questions of the Korean Occupational Stress Scale

| Item no. | Subscales                | Contents                      | Questions                                                                       |
|----------|--------------------------|-------------------------------|---------------------------------------------------------------------------------|
| 1        | Job demand               | Time pressure                 | Due to many things to do, I always feel time pressure.                          |
| 2        |                          | Increasing workload           | My job has become increasingly overloaded.                                      |
| 3        |                          | Insufficient rest             | Sufficient rest is provided during working hours.                               |
| 4        |                          | Multiple functioning          | I have to do various jobs simultaneously.                                       |
| 5        | Insufficient job control | Noncreative work              | My work requires creativity.                                                    |
| 6        |                          | Skill underutilization        | My work requires a high level of skill or knowledge.                            |
| 7        |                          | Little or no decision making  | I can make my own decisions in my job and have influence over the work.         |
| 8        |                          | Low control                   | I can control my work pace and time schedule.                                   |
| 9        | Interpersonal conflict   | Inadequate supervisor support | My supervisor is helpful in getting the job done.                               |
| 10       |                          | Inadequate coworker support   | My coworker is helpful in getting the job done.                                 |
| 11       |                          | Lack of emotional support     | I have someone who understands my difficulties at work.                         |
| 12       | Job insecurity           | Uncertainty                   | My future is uncertain because the current situation of my company is unstable. |
| 13       |                          | Changes negative to my job    | Undesirable changes (i.e., downsizing) will come to my job.                     |
| 14       | Organizational system    | Unfair organizational policy  | The organizational policy of my company is fair and reasonable.                 |
| 15       |                          | Unsatisfactory organization   | My company provides me with sufficient organizational support.                  |
| 16       |                          | Interdepartmental conflict    | Departments cooperate with each other and without conflicts.                    |
| 17       |                          | Limitation of communication   | I have opportunities and channels to talk about my ideas.                       |
| 18       | Lack of reward           | Unfair treatment              | I earn respect and confidence from my company.                                  |
| 19       |                          | Future ambiguity              | I believe that I will be given more rewards from my company if I work hard.     |
| 20       |                          | Interruption of opportunity   | I am provided with opportunities to develop my capacity.                        |
| 21       | Occupational climate     | Collective culture            | Dining out after work makes me uncomfortable.                                   |
| 22       |                          | Inconsistency of job order    | I am asked to do my work with irrational principle or inconsistency.            |
| 23       |                          | Authoritarian climate         | My company climate is authoritative and hierarchical.                           |
| 24       |                          | Gender discrimination         | I take disadvantages since I am woman (man).                                    |

Adapted from Chang et al.<sup>26</sup>
